# Supplementary material
Source: publisher site journal article supplement (https://www.dovepress.com/article/581645)

Supplementary File

Table S1. Searching Strategy

| Database | MeSH Terms | Results |
| --- | --- | --- |
| PubMed | ((((((((((((telehealth[MeSH Terms]) OR (telemedicine[MeSH Terms])) OR (mhealth[MeSH Terms])) OR (telenursing[MeSH Terms])) OR (mobile health[MeSH Terms])) OR (home-based therapy[MeSH Terms])) OR (remote therapy[MeSH Terms])) OR (telerehabilitation[MeSH Terms])))) OR (((((hospital-based[MeSH Terms]) OR (hospital-based therapy[MeSH Terms])) OR (centre-based[MeSH Terms])) OR (center-based[MeSH Terms])) OR (traditional rehabilitation[MeSH Terms]))) AND ((((((((exercise[MeSH Terms]) OR (physical exercise[MeSH Terms])) OR (exercise therapy[MeSH Terms])) OR (physical training[MeSH Terms])) OR (aerobic exercise[MeSH Terms])) OR (resistance training[MeSH Terms])) OR (physical exertion[MeSH Terms])) OR (exertion[MeSH Terms]))) AND ((((cardiac[MeSH Terms]) OR (cardiac rehabilitation[MeSH Terms])) OR (cardiovascular rehabilitation[MeSH Terms])) OR (cardiac rehab[MeSH Terms])) | 1136 |
| Cochrane | (telehealth OR telemedicine OR telerehabilitation OR "remoted therapy" OR "home-based therapy" OR hospital-based OR centre-based OR "traditional rehabilitation") AND (exercise OR "physical exercise" OR "exercise therapy" OR "physical training" OR "aerobic exercise" OR "resistance training" OR exertion OR "physical exertion") AND (cardiac OR "cardiac rehabilitation" OR "cardiovascular rehabilitation" OR "cardiac rehab") | 462 |
| Scopus | ( ( telehealth OR telemedicine OR telerehabilitation OR "remoted therapy" OR "home-based therapy" OR hospital-based OR centre-based OR "traditional rehabilitation" AND exercise OR "physical exercise" OR "exercise therapy" OR "physical training" OR "aerobic exercise" OR "resistance training" OR exertion OR "physical exertion" AND cardiac OR "cardiac rehabilitation" OR "cardiovascular rehabilitation" OR "cardiac rehab" ) ) | 912 |

Table S2. Physical Function Outcome Home vs Centre-based Cardiac Rehabilitation

| Author | Home-based | | | Clinical Interpretation (MCID) | Centre-based | | | Clinical Interpretation (MCID) |
| --- | --- | --- | --- | --- | --- | --- | --- | --- |
| Baseline (Mean±SD) | Post (Mean±SD) | Δ (Mean) | Baseline (Mean±SD) | Post (Mean±SD) | Δ (Mean) |
| VO2max (mL/kg/min) | | | | | | | | |
| Aamot et al (2014)27 | 34.4± 4.8 | 37.2 ± 5.2 | 2.8 | Yes | 34.7± 7.3 | 39 ± 8.0 | 4.3 | Yes |
| Arthur et al (2002)29 | 16,08 ± 4,53 | 18,26 ± 7,94 | 2.18 | Yes | 14.94 ± 3.39 | 18.10 ± 7.86 | 3.16 | Yes |
| Avila et al (2018)25 | 26.7± 6.55 | 27.8 ± 6.83 | 1.1 | Yes | 25.4± 7.32 | 26.7 ± 7.9 | 1.3 | Yes |
| Batalik et al (2020)31 | 23.7± 4.1 | 26.5 ± 5.7 | 2.8 | Yes | 23.4± 3.3 | 25.9 ± 4.1 | 2.5 | Yes |
| Cai et al (2022)30 | 19.1± 4.7 | 27.3 ± 8.0 | 9.3 | Yes | 18.7± 4.9 | 22.9 ± 6.6 | 4.9 | Yes |
| Frederix et al (2017)26 | 22 ± 6 | 24 ± 8 | 2 | Yes | 23± 6 | 22 ± 6 | -1 | No |
| Gordon et al (2002) | NR | 1.6 ± 2.1 | NR | NR | NR | 0.9 ± 1.9 | NR | NR |
| Izquierdo-Garcia et al (2023)32 | 22.66 ± 9.19 | 16.45 ± 5.3 | -6.21 | No | 18.3 ± 3.38 | 23.67 ± 11.95 | 5.37 | Yes |
| Kraal et al (2014)33 | 22.8 ± 4.2 | 26.0 ± 5.9 | 3.2 | Yes | 23.7 ± 6.4 | 26.1 ± 7.6 | 2.4 | Yes |
| Maddison et al (2019)34 | 27.22 ± 7.91 | 30.52 ± 9.63 | 3.33 | Yes | 27.70 ± 6.77 | 29.39 ± 6.75 | 1.69 | Yes |
| Moholdt et al (2012)28 | 23.8 ± 5.4 | 27.7 ± 6.5 | 3.9 | Yes | 25.6 ± 4.0 | 30.2 ± 4.3 | 4.6 | Yes |
| Oerkild et al (2011)35 | 18.7 ± 3.2 | 16.2 ± 4.0 | -2.5 | No | 16.7 ± 2.3 | 14.7 ± 4.3 | -2 | No |
| 6 MWD (m) | | | | | | | | |
| Hwang et al (2017)23 | 346 ± 104 | 374 ± 89 | 28 | Yes | 382 ± 106 | 410 ± 103 | 28 | Yes |
| Oerkild et al (2011)35 | NR | NR | 17.4 | No | NR | NR | 36.1 | Yes |
| Varnfield et al (2014)24 | 537±86 | 584 ± 99 | 47 | Yes | 510±77 | 570 ± 80 | 60 | Yes |

Notes: Δ Mean = Post − Baseline. **MCID benchmarks for within-group mean change:** VO₂peak/VO₂max ≥ **1 mL/kg/min** (Tegegne et al., 2022) and 6MWD ≥ **25 m** (Gremeaux et al., 2011). “Yes” indicates the **mean within-group change** meets/exceeds the benchmark; “No” indicates it does not. MCID values are used as **interpretive benchmarks** and may vary by diagnosis and baseline severity. NR = not reported.

Table S3. Quality of Life among Home vs Centre-based Cardiac Rehabilitation

| Author | Home-based | Centre-based |
| --- | --- | --- |
| Quality of Life (QOL) | | |
| Aamot et al (2014)27   - Emotional - Social - Physical - Global | 6.1  6.8  6.4  6.4 | 6.0  6.7  6.6  6.3 |
| Arthur et al (2002)29   - Physical - Social - Interpersonal | 51.2  36  9.2 | 48.6  34.6  8.8 |
| Avila et al (2018)25   - Physical - General health - Social - Emotional - Mental health | 91.9 ± 7.6  75.2 ± 18.7  90.6 ± 16.5  86.8 ± 22.8  77.5 ± 17.6 | 87.4 ± 13.6  89 ± 22.9  89.1 ± 15.7  86.8 ± 29.1  81.4 ± 15 |
| Batalik et al (2020)31   - Overall QOL | 62.0 ± 7.0 | 61.5 ± 7.1 |
| Frederix et al (2017)26 | 2.28 ± 0.63 | 2.52 ± 0.52 |
| Kraal et al (2014)33   - Physical - Emotional - Social - Total | 6.1 ± 0.6  5.9 ± 0.8  6.4 ± 0.6  6.1 ± 0.5 | 5.7 ± 0.8  5.6 ± 0.9  5.7 ± 0.8  5.8 ± 0.7 |
| Maddison et al (2019)34   - Overall QOL | 0.90 ± 0.13 | 0.93 ± 0.09 |
| Moholdt et al (2012)28   - Physical - Emotional - Social | 6.2 ±  0.4  5.6 ±  0.9  5.9 ±  0.5 | 6.3 ±  0.7  5.8 ±  1.1  6.3 vs 0.8 |
| Varnfield et al (2014)24 | 0.82 | 0.84 |

Table S4. Cardiovascular Risk among Home vs Centre-based Cardiac Rehabilitation

| Author | Home-based | Centre-based |
| --- | --- | --- |
| Aamot et al (2014)27   - Resting HR | 54 ± 7 | 57 ±  8 |
| Avila et al (2018)25   - BMI - Body fat - Hip circumference - SBP - DBP - HR Rest | 26.4 ± 2.5  26.5 ± 6.1  101 ± 5.4 vs  124.1 ± 13.9  75.8 ± 9  56.4 ± 7.4 | 27.6 ± 4.1  28.4 ± 6.4  102.7 ± 7.6  124.1 ± 13.8  74.7 ± 8.2  57.7 ±10.1 |
| Izquierdo-Garcia et al (2023)32   - SBP - Abdominal circumference - Total Cholesterol - LDL - HDL - Triglycerides | 130.17 ± 8,84  97 ± 4.73  119.8 ± 22.4  56.60 ± 12.90  44.20 ± 3.35  94.60 ± 42.26 | 121.13 ± 13.74  97.93 ± 9.57  114.33 ± 18.10  49.11 ± 11.98  45.22 ± 15.42  100.22 ± 48.03 |
| Maddison et al (2019)34   - BMI - Waist - SBP - DBP - Total Cholesterol - LDL - HDL - Triglyceride | 29.03 ± 4.32  103.20 ± 10.82  135.6 ± 16.66  78.04 ± 9.04  3.62 ± 0.98  1.95 ± 0.97  1.15 ± 0.40  1.48 ± 0.81 | 27.58 ± 3.34  99.6 ± 10.11  130.5 ± 15.14  78.11 ± 10.83  3.55 ± 0.92  1.71 ± 0.59  1.13 ± 0.37  1.66 ± 1.11 |
| Moholdt et al (2012)28   - HLD - Triglycerides - Total Cholesterol | 1.2 ±  0.2  1.4 ±  0.7  4.3 ±  0.7 | 1.4 ±  0.2  1.6 ±  1.1  4.3 ±  1.0 |
| Oerkild et al (2011)35   - SBP - DBP - Total Cholesterol - HDL - LDL | 131.9 ± 19.6  69.9 ± 10.7  4.4 ± 0.9  1.5 ± 0.5  2.2 ± 0.7 | 137.1 ± 23.2  76 ± 8.5  3.7 ± 1.2  1.26 ± 0.6  1.9 ± 1.1 |
| Varnfield et al (2014)24   - SBP - DBP - HR rest - Abdominal circumference - Total Cholesterol - LDL - HDL - Triglyceride | 124.4±15  76.2±7.6 63.3±11.7  100.7±8.7  2.96±0.66  1.61±0.53  0.92±0.20  1.05±0.69 | **123.1** ±17.12  **71.7** ±8.9  64.3±10.8  101.1±14.4  3.22±0.81  1.66±0.51  0.99±0.38  1.13±0.70 |

Notes: HR, heart rate; BMI, body mass index; SBP, systolic blood pressure; DBP, diastolic blood pressure; HDL, high density lipoprotein; LDL, low density lipoprotein.

Figure S1. Sub group analysis of Delivery Models on VO2peak


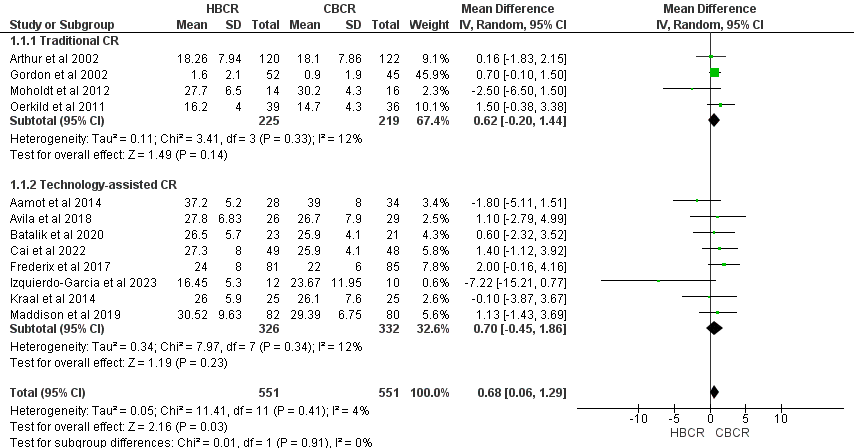

Supplement: Supplementary file 1 [file 581645%20Supplementary%20Material.docx]
